# Supplementary material
Source: publisher figshare collection journal article supplement (https://rs.figshare.com/ndownloader/files/22722854)
Supplement: Supplementary file 1 [file 22722854]

# Analysis of sperm sex ratio.

#Variables include 
# Male.id, The unique ID for each experimental male; Treat , Treatment with: rivals or no rivals; 
# Fam.id, Family ID; Tub.id, Tub ID; Weaning.weight, Body weight at weaning; Male.weight, Body weight at sexual maturity (adult); 
# TESTIS.R, Weight of right testis; TESTIS.L, Weight of left testis; Testes.weight, Combined testes weight;
# Testost, Serum testosterone concentration; Prop.Y, Proportion of Y-CBS; Prop.X, Proportion of X-CBS; 
# E.Number.Y, Concentration of Y-CBS in entire sample (i.e., PROP.Y x CONC); E.Number.X, Concentration of X-CBS in entire sample (i.e., PROP.X x CONC); 
# Amount.sperm, Amount of sperm suspension added to each assay (in uL); total.n.sperm, Total number of sperm in each assay; 
# n.sperm.Y, Number of Y-CBS in each assay; n.sperm.X, Number of X-CBS in each assay.
# RANDOM FACTORS: Fam.id, Tub.id

#### Load libraries ####
library(lattice) 
library(lme4)
library(car) 
library(lmtest)
library(MASS)
library(gplots)

#### Load data  ####
data = read.table("SSR2.txt",header=TRUE,sep="\t")

# Define factors
data$Treat <- as.factor(data$Treat)
data$Fam.id <- as.factor(data$Fam.id)
data$Male.id <- as.factor(data$Male.id)
data$Tub.id <- as.factor(data$Tub.id)
str(data)

# Testosterone distribution doesn't follow normal curve
mean(data$Testost, na.rm=TRUE)
range(data$Testost, na.rm=TRUE)
hist(data$Testost)
shapiro.test(data$Testost)
# Transformation of Testosterone
data$LTestost <- log((data$Testost)+1)
mean(data$LTestost, na.rm=TRUE)
range(data$LTestost, na.rm=TRUE)
hist(data$LTestost)
shapiro.test(data$LTestost)
# A bit better. Check residuals in models.

# Centering covariates
data$cent.Male.weight<-(data$Male.weight-mean(data$Male.weight,na.rm=TRUE))
hist(data$cent.Male.weight)
mean(data$cent.Male.weight, na.rm=T)
shapiro.test(data$cent.Male.weight)

data$cent.Testes.weight<-(data$Testes.weight-mean(data$Testes.weight,na.rm=TRUE))
hist(data$cent.Testes.weight)
mean(data$cent.Testes.weight, na.rm=T)
shapiro.test(data$cent.Testes.weight)

data$cent.LTestost<-(data$LTestost-mean(data$LTestost,na.rm=TRUE))
hist(data$cent.LTestost)
mean(data$cent.LTestost, na.rm=T)
shapiro.test(data$cent.LTestost)

#Subset removing outlier Male ID 16b because of clearly abnormal small testis.
dim(data)
data <- subset(data, Male.id != "16b")
dim(data) #Check dimension of new dataset

#### Testosterone LMMs ####
#### Testosterone LMM - MODEL WITH INTERACTION ####
M1<-lmer(LTestost~Treat*cent.Male.weight+ (1|Fam.id)+(1|Tub.id),
                 REML=FALSE, data = data)
summary(M1)
Anova(M1) #Chi square. Wald test.
#Final model with REML
M1<-lmer(LTestost~Treat*cent.Male.weight+ (1|Fam.id)+(1|Tub.id),
         REML=TRUE, data = data)
summary(M1)
# Diagnostic plots:
par(mfrow = c(2, 2))
plot(M1)
diagnostics.plot(M1)

#### Testosterone LMM - MODEL WITHOUT INTERACTION ####
M1<-lmer(LTestost~Treat+cent.Male.weight+ (1|Fam.id)+(1|Tub.id),
         REML=FALSE, data = data)
summary(M1)
Anova(M1) #Chi square. Wald test.
#Final model with REML
M1<-lmer(LTestost~Treat+cent.Male.weight+ (1|Fam.id)+(1|Tub.id),
         REML=TRUE, data = data)
summary(M1)
# Diagnostic plots:
par(mfrow = c(2, 2))
plot(M1)
diagnostics.plot(M1) 

#### Sperm sex ratio GLMMs ####
#### Binomial GLMM model on SSR with interactions ####
B1 <- glmer(cbind(n.sperm.Y, n.sperm.X) ~ Treat * cent.Testes.weight * cent.LTestost +
              (1|Fam.id) + (1|Tub.id), 
            family = binomial, data = data)
summary(B1)
#Do we have dispersion issues?
N<-nrow(data)
E <- residuals(B1, type="pearson")
p <- length(fixef(B1)) + 2  #1 because of sigma_Fam.id and sigma_Tub.id
Overdisp1 <- sum(E^2) / (N-p)
Overdisp1 # 0.258
# Correction:
# Correction in quasi likelihood is done multiplying the SEs of the coefficients by the square root of phi (dispersion).
# The betas (estimates) do not change, but the associated SEs do change, and thus the t value [=Estimate/SE(Estimate)] changes, and therefore the
# associated p values.
B1Est.Param <- fixef(B1) #Get the betas
param.SD <-  sqrt(diag(vcov(B1)))   #Get the SEs
corrected.param.SD <- param.SD*sqrt(Overdisp1) # Corrected SEs by multiplying the SEs above by the sqrt of the dispersion
pval <- 2*pnorm(-abs(B1Est.Param  / corrected.param.SD))  #Z distribution
Zval <- (B1Est.Param  / corrected.param.SD) # Z values.
cbind(B1Est.Param, corrected.param.SD, Zval, pval) # These are the values for the quasi likelihood
# Diagnostic plots
par(mfrow = c(2, 2))
plot(B1)
diagnostics.plot(B1)

#### Binomial GLMM model on SSR without interactions. ####
B1 <- glmer(cbind(n.sperm.Y, n.sperm.X) ~ Treat + cent.Testes.weight + cent.LTestost +
              (1|Fam.id) + (1|Tub.id), 
            family = binomial, data = data)
summary(B1)
#Do we have dispersion issues?
N<-nrow(data)
E <- residuals(B1, type="pearson")
p <- length(fixef(B1)) + 2  #1 because of sigma_Fam.id and sigma_Tub.id
Overdisp1 <- sum(E^2) / (N-p)
Overdisp1 # 0.23
# # Correction:
B1Est.Param <- fixef(B1) #Get the betas
param.SD <-  sqrt(diag(vcov(B1)))   #Get the SEs
corrected.param.SD <- param.SD*sqrt(Overdisp1) # Corrected SEs by multiplying the SEs above by the sqrt of the dispersion
pval <- 2*pnorm(-abs(B1Est.Param  / corrected.param.SD))  #Z distribution
Zval <- (B1Est.Param  / corrected.param.SD) # Z values.
cbind(B1Est.Param, corrected.param.SD, Zval, pval) # These are the values for the quasi likelihood
# Diagnostic plots
par(mfrow = c(2, 2))
plot(B1)
diagnostics.plot(B1)

#### Binomial GLMM model on SSR, using residuals of testes weight on body weight, with interactions ####
#Residuals
M1R<-lmer(Testes.weight~Male.weight+ (1|Fam.id)+(1|Tub.id),
          REML=FALSE, data = data)
data$Residuals <-resid(M1R)
#Centering residuals is not needed as residuals are already centered
#Model
B1 <- glmer(cbind(n.sperm.Y, n.sperm.X) ~ Treat * Residuals * cent.LTestost +
              (1|Fam.id) + (1|Tub.id), 
            family = binomial, data = data)
summary(B1)
#Do we have dispersion issues?
N<-nrow(data)
E <- residuals(B1, type="pearson")
p <- length(fixef(B1)) + 2  #1 because of sigma_Fam.id and sigma_Tub.id
Overdisp1 <- sum(E^2) / (N-p)
Overdisp1 # 0.25
# Correction:
B1Est.Param <- fixef(B1) #Get the betas
param.SD <-  sqrt(diag(vcov(B1)))   #Get the SEs
corrected.param.SD <- param.SD*sqrt(Overdisp1) # Corrected SEs by multiplying the SEs above by the sqrt of the dispersion
pval <- 2*pnorm(-abs(B1Est.Param  / corrected.param.SD))  #Z distribution
Zval <- (B1Est.Param  / corrected.param.SD) # Z values.
cbind(B1Est.Param, corrected.param.SD, Zval, pval) # These are the values for the quasi likelihood
# Diagnostic plots
par(mfrow = c(2, 2))
plot(B1)
diagnostics.plot(B1)

#### Binomial GLMM model on SSR, using residuals of testes weight on body weight, without interactions ####
B1 <- glmer(cbind(n.sperm.Y, n.sperm.X) ~ Treat + Residuals + cent.LTestost +
              (1|Fam.id) + (1|Tub.id), 
            family = binomial, data = data)
summary(B1)
#Do we have dispersion issues?
N<-nrow(data)
E <- residuals(B1, type="pearson")
p <- length(fixef(B1)) + 2  #1 because of sigma_Fam.id and sigma_Tub.id
Overdisp1 <- sum(E^2) / (N-p)
Overdisp1 # 0.23
# Correction:
B1Est.Param <- fixef(B1) #Get the betas
param.SD <-  sqrt(diag(vcov(B1)))   #Get the SEs
corrected.param.SD <- param.SD*sqrt(Overdisp1) # Corrected SEs by multiplying the SEs above by the sqrt of the dispersion
pval <- 2*pnorm(-abs(B1Est.Param  / corrected.param.SD))  #Z distribution
Zval <- (B1Est.Param  / corrected.param.SD) # Z values.
cbind(B1Est.Param, corrected.param.SD, Zval, pval) # These are the values for the quasi likelihood
# Diagnostic plots
par(mfrow = c(2, 2))
plot(B1)
diagnostics.plot(B1)
